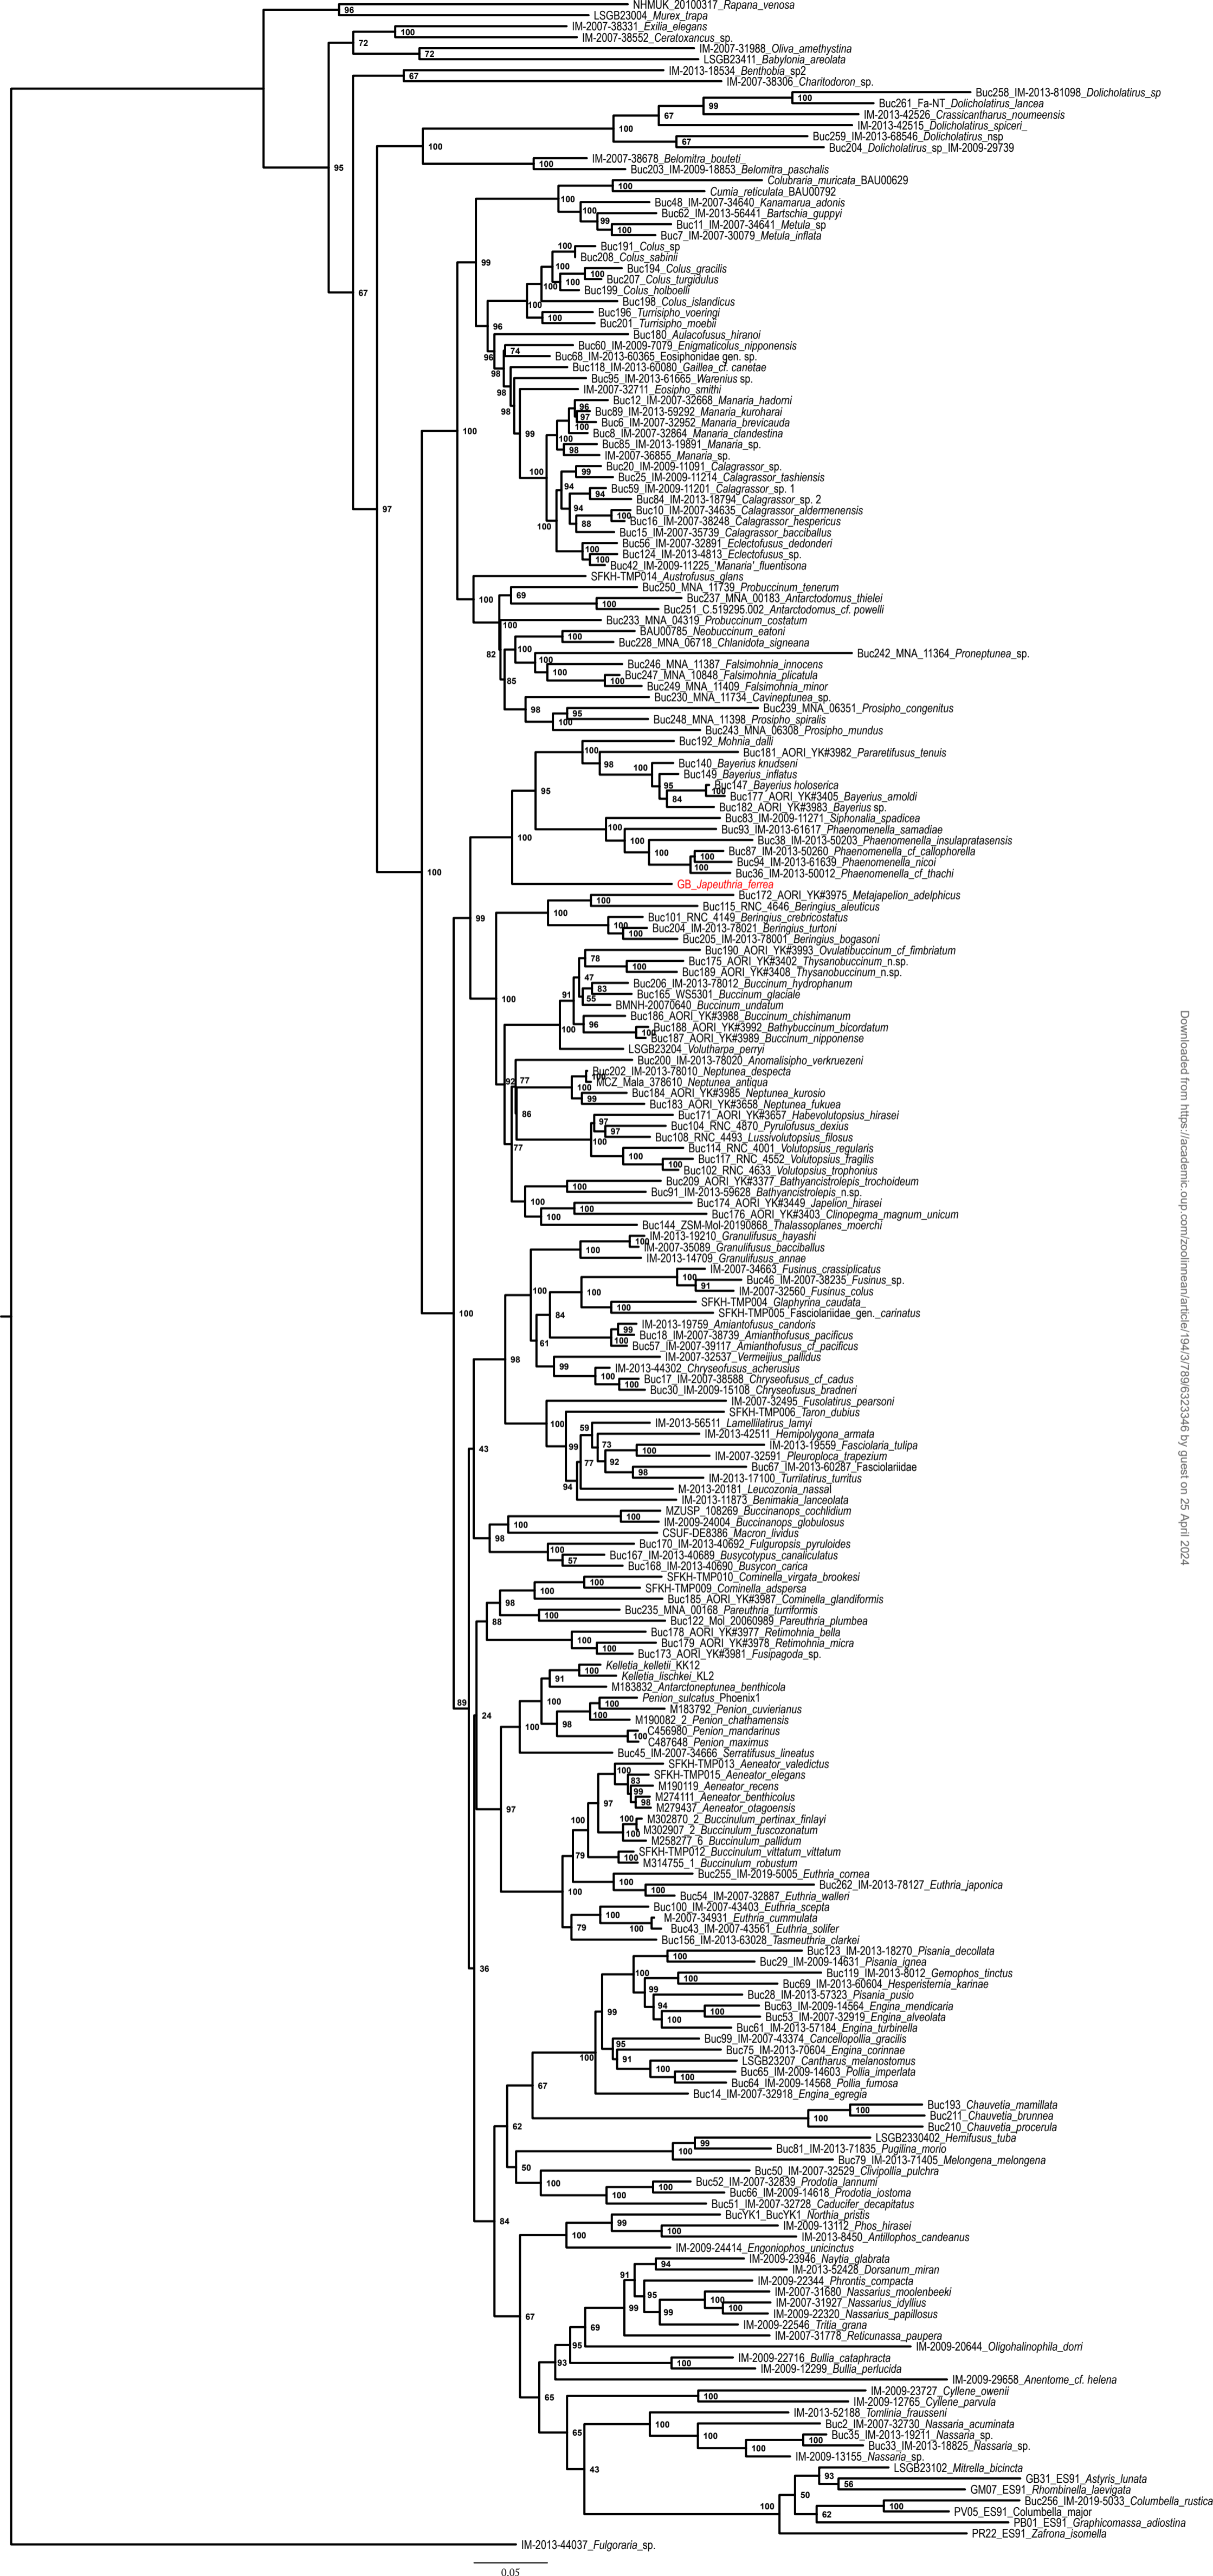

Downloaded from https://academic.oup.com/zoolin/article/194/3/789/6323346 by guest on 25 April 2024
